# Supplementary material
Source: PubMed Central journal article supplement (PMC5123913)
Supplement: NIHMS805509-supplement-6.pdf [file NIHMS805509-supplement-6.pdf]

**Table S5.** Associations between prescribed ultrafiltration rate and all-cause mortality in models with and without serum sodium adjustment.<sup>a</sup>

|                                         | <b>Presented analyses<br/>without adjustment for<br/>serum sodium<sup>a</sup><br/>(N=118,394)</b> | <b>Sensitivity analyses<br/>with adjustment for<br/>serum sodium using<br/>multiple imputation for<br/>missing values<sup>b</sup><br/>(N=118,394)</b> | <b>Sensitivity analyses<br/>with adjustment for<br/>serum sodium using a<br/>cohort restricted to<br/>individuals with serum<br/>sodium<sup>c</sup><br/>(N=30,176)</b> |
|-----------------------------------------|---------------------------------------------------------------------------------------------------|-------------------------------------------------------------------------------------------------------------------------------------------------------|------------------------------------------------------------------------------------------------------------------------------------------------------------------------|
|                                         | Adjusted HR<br>(95% CI)                                                                           | Adjusted HR<br>(95% CI)                                                                                                                               | Adjusted HR<br>(95% CI)                                                                                                                                                |
| Mean UF rate dichotomized at 10 mL/h/kg |                                                                                                   |                                                                                                                                                       |                                                                                                                                                                        |
| ≤10 mL/h/kg                             | 1.00 (reference)                                                                                  | 1.00 (reference)                                                                                                                                      | 1.00 (reference)                                                                                                                                                       |
| >10 mL/h/kg                             | 1.22 (1.20-1.24)                                                                                  | 1.20 (1.18-1.22)                                                                                                                                      | 1.19 (1.15-1.24)                                                                                                                                                       |
| Mean UF rate dichotomized at 13 mL/h/kg |                                                                                                   |                                                                                                                                                       |                                                                                                                                                                        |
| ≤13 mL/h/kg                             | 1.00 (reference)                                                                                  | 1.00 (reference)                                                                                                                                      | 1.00 (reference)                                                                                                                                                       |
| >13 mL/h/kg                             | 1.31 (1.28-1.34)                                                                                  | 1.28 (1.25-1.31)                                                                                                                                      | 1.27 (1.21-1.34)                                                                                                                                                       |
| Mean UF rate categorized                |                                                                                                   |                                                                                                                                                       |                                                                                                                                                                        |
| <10 mL/h/kg                             | 1.00 (reference)                                                                                  | 1.00 (reference)                                                                                                                                      | 1.00 (reference)                                                                                                                                                       |
| 10-13 mL/h/kg                           | 1.12 (1.10-1.15)                                                                                  | 1.11 (1.09-1.14)                                                                                                                                      | 1.11 (1.06-1.16)                                                                                                                                                       |
| >13 mL/h/kg                             | 1.35 (1.32-1.39)                                                                                  | 1.32 (1.29-1.36)                                                                                                                                      | 1.32 (1.25-1.38)                                                                                                                                                       |

<sup>a</sup> Fine and Gray proportional subdistribution hazards regression models with kidney transplantation and dialysis modality change treated as competing risks were used to estimate the ultrafiltration rate and all-cause mortality association. Adjusted for baseline age (continuous), gender (female vs. male), race (black vs. non-black), ethnicity (Hispanic vs. non-Hispanic), time on dialysis (1-2, 3-4, ≥5 vs. <1 year), vascular access (graft, fistula vs. catheter), history of heart failure (yes vs. no), history of cardiovascular disease (yes vs. no), history of diabetes (yes vs. no), albumin (3.1-3.5, 3.6-4.0, >4.0 vs. ≤3.0 g/dL), creatinine (continuous), phosphorous (4.1-5.0, 5.1-6.0, >6.0 vs. ≤4.0 mg/dL), hemoglobin (10.0-11.9, ≥12.0 vs. <10.0 g/dL), urea reduction ratio (continuous), pre-HD systolic BP (131-150, 151-170, >170 vs. ≤130 mmHg), missed sessions (≥3 vs. <3).

<sup>b</sup> Fine and Gray proportional subdistribution hazards regression models with kidney transplantation and dialysis modality change treated as competing risks were used to estimate the ultrafiltration rate and all-cause mortality association. Adjusted for baseline age (continuous), gender (female vs. male), race (black vs. non-black), ethnicity (Hispanic vs. non-Hispanic), time on dialysis (1-2, 3-4, ≥5 vs. <1 year), vascular access (graft, fistula vs. catheter), history of heart failure (yes vs. no), history of cardiovascular disease (yes vs. no), history of diabetes (yes vs. no), albumin (3.1-3.5, 3.6-4.0, >4.0 vs. ≤3.0 g/dL), creatinine (continuous), phosphorous (4.1-5.0, 5.1-6.0, >6.0 vs. ≤4.0 mg/dL), hemoglobin (10.0-11.9, ≥12.0 vs. <10.0 g/dL), urea reduction ratio (continuous), pre-HD systolic BP (131-150, 151-170, >170 vs. ≤130 mmHg), missed sessions (≥3 vs. <3), **serum sodium (<136, 136-139, 139-142, ≥142 mEq/L). Serum sodium imputed using the Markov chain Monte Carlo method with 10 imputations for missing serum sodium values (n=88,218). Full cohort used.**

<sup>c</sup> Fine and Gray proportional subdistribution hazards regression models with kidney transplantation and dialysis modality change treated as competing risks were used to estimate the ultrafiltration rate and all-cause mortality association. Adjusted for baseline age (continuous), gender (female vs. male), race (black vs. non-black), ethnicity (Hispanic vs. non-Hispanic), time on dialysis (1-2, 3-4, ≥5 vs. <1 year), vascular access (graft, fistula vs. catheter), history of heart failure (yes vs. no), history of cardiovascular disease (yes vs. no), history of diabetes (yes vs. no), albumin (3.1-3.5, 3.6-4.0, >4.0 vs. ≤3.0 g/dL), creatinine (continuous), phosphorous (4.1-5.0, 5.1-6.0, >6.0 vs. ≤4.0 mg/dL), hemoglobin (10.0-11.9, ≥12.0 vs. <10.0 g/dL), urea reduction ratio (continuous), pre-HD systolic BP (131-150, 151-170, >170 vs. ≤130 mmHg), missed sessions (≥3 vs. <3), **serum sodium (<136, 136-139, 139-142, ≥142 mEq/L). Cohort restricted to only those individuals with serum sodium values (no imputation).**
